1 **Assessing Patient Satisfaction in Ibadan South-west Region of Oyo State, Nigeria**

2

3 Abel Nnandi Chukwuemeka<sup>1,6</sup>, Folahanmi Tomiwa Akinsolu<sup>1,4,5</sup>, Marylyn Bukola  
4 Adekola<sup>2</sup>, Mobolaji Timothy Olagunju<sup>3</sup>, Olunike Rebecca Abodunrin<sup>3</sup>, Ifeoluwa  
5 Eunice Adewole<sup>1</sup>, Oluwabukola Mary Ola<sup>1</sup>, Oliver Chukwujekwu Ezechi<sup>1,4,5</sup>.

6

7

8 <sup>1</sup> Department of Public Health, Faculty of Basic Medical and Health Sciences,  
9 Lead City University Ibadan, Oyo State, Nigeria.

10 <sup>2</sup> Department of Public Health, Southern Illinois University Edwardsville, USA.

11 <sup>3</sup> Department of Epidemiology and Biostatistics, Nanjing Medical University,  
12 China.

13 <sup>4</sup> Clinical Science Department, Nigerian Institute of Medical Research, Lagos,  
14 Nigeria

15 <sup>5</sup> Center for Reproduction and Population Health Studies, Nigerian Institute of  
16 Medical Research, Lagos, Nigeria

17 <sup>6</sup> Department of Planning, Research, Monitoring and Evaluation, Lagos State  
18 Health Management Agency, Alausa, Lagos. Nigeria

19

20

21 **Corresponding Author:**

22

23 Chukwuemeka Abel\*,

24 Department of Public Health,

25 Lead City University Ibadan, Oyo State, Nigeria.

26 Tel : +2349056244346

27 Email: adoncollion@gmail.com

28

29

30 **NOTE: This preprint reports new research that has not been certified by peer review and should not be used to guide clinical practice.**

31

32

33

34

35

36

37

38

39

40 **Abstract**

41 Introduction

42 Patient satisfaction plays a critical role in healthcare service delivery. Despite growing  
43 studies, patient satisfaction levels are still widely under-reported in Nigeria. This  
44 study assessed patient satisfaction among patients in primary and secondary  
45 healthcare facilities in Ibadan Southwest local government area of Oyo State, Nigeria.

46 Method and Materials

47 In this cross-sectional study, investigators collected data using the Short-form Patient  
48 Satisfaction Questionnaire (PSQ-18). The data was analyzed using the Statistical  
49 Package for the Social Sciences (SPSS) software with descriptive statistics and  
50 One-way analysis of variance (ANOVA).

51 Results

52 A total of 387 patients participated in the study, and results showed that overall  
53 satisfaction among patients was 67.9%, where Communication (84.5%) and Financial  
54 Aspect (54.9%) recorded the highest and lowest percentage of positive responses

55 respectively.

## 56 Conclusion

57 Patient satisfaction is a growing subject in Nigeria. It has a significant influence on  
58 healthcare service delivery. Stakeholders, policymakers, and managers should employ  
59 policies, strategies, and programs to improve the quality of healthcare service delivery  
60 across Nigeria.

61 Keywords: Patient Satisfaction, Healthcare Facilities, Percentage of Positive  
62 Responses (PPR), Short-form Patient Satisfaction Questionnaire (PSQ-18), Ibadan  
63 South-west Local Government Area (LGA), Oyo State, Nigeria.

64 Word Count: 179

65

66

67

## 68 **Introduction**

69 Over the years, patient satisfaction has become a crucial factor used to determine the  
70 performance of healthcare facilities. It is described as a reflection of how content a  
71 patient is with their overall experience at their health care service provider.<sup>1</sup>

72 The origins of patient satisfaction in health care can be traced back to Press Ganey in  
73 1985 when patient satisfaction surveys gained popularity among healthcare  
74 institutions that understood the benefit of monitoring patient satisfaction and  
75 comparing it to other institutions in a comparable industry.<sup>2</sup>

76 Patient satisfaction has taken prominence in efforts to enhance healthcare quality

77 worldwide, as there is a growing recognition of the significance of patient-centered  
78 care and its influence on general health outcomes.<sup>3</sup> The development of patient  
79 engagement strategies such as E-health tools to improve access to care, innovative  
80 communication strategies, and patient satisfaction survey tools are examples of the  
81 high level of commitment shown towards improving patient satisfaction.<sup>4,5,6</sup>

82 Several factors influence patients' satisfaction during care, including interpersonal  
83 communication with health care professionals, technical quality of care, cost of care,  
84 time spent with health care professionals, and waiting time.<sup>7</sup> Recent studies have  
85 highlighted relationships between patient satisfaction and patients' attitudes towards  
86 care.<sup>8</sup> Ensuring that patients are satisfied, well understood, and respected during care  
87 is critical, which can lead to a positive attitude towards care. For instance, an  
88 unsatisfied patient might seek an alternative form of care if their experience at a  
89 healthcare facility was unpleasant.<sup>9</sup> Furthermore, communication is a reliable  
90 predictor of patients' attitudes towards care, where patients' desire to accept  
91 follow-up visits significantly correlated with their readiness to communicate with  
92 healthcare professionals.<sup>10</sup>

93 In addition, studies have linked long waiting times with dissatisfaction of patients  
94 receiving care in health care facilities as patients frequently had specific durations of  
95 stay at a medical facility and exceeding this would contradict their expectations.<sup>11,12</sup>

96 Achieving satisfaction among patients regarding care can be challenging, especially  
97 when patients' expectations do not align with the healthcare institutions' goals.<sup>13</sup>

98 Patient feedback, obtained through questionnaires or interviews, is crucial for  
99 assessing patient satisfaction in healthcare. It provides insights into staff  
100 communication, waiting times, and amenities, enabling practitioners to improve  
101 patient experience.<sup>14</sup>

102 Nigeria and other low- and middle-income countries face unique difficulties in  
103 providing healthcare.<sup>15</sup> Complexities in improving patient satisfaction include  
104 overcrowding in medical facilities, unequal allocation of resources, and issues with  
105 communication.<sup>16</sup> Analyzing the healthcare system in Nigeria offers essential insights  
106 into the complexities of patient satisfaction in a continuously changing healthcare  
107 environment.

108 The objective of this study was to assess patient satisfaction among patients in  
109 primary and secondary healthcare facilities in Ibadan South-west local government  
110 area (LGA) of Oyo State, Nigeria. This study was part of a more extensive study that  
111 assessed patient safety culture among healthcare professionals and patient satisfaction  
112 in Ibadan South-west LGA of Oyo State, Nigeria.

## 113 **Methods**

### 114 *Study Design and Setting*

115 This descriptive cross-sectional multicenter study was conducted in Ibadan southwest  
116 LGA of Oyo State, Nigeria. Ibadan South-west LGA is an urban area of Ibadan city  
117 with an estimated population of 397,700 individuals, a landmass of 25.13 km<sup>2</sup>, a  
118 population density of 15,828 km<sup>2</sup>, and an annual population density of 3.5% from the

119 year 2006 to 2016.<sup>17</sup> With a population index (persons per facility) of 10,150 persons,  
120 Ibadan South-west LGA has 43 hospitals with 22 PHCs and 21 secondary hospitals  
121 (16 private and five public secondary hospitals).<sup>18</sup> The selected LGA comprised two  
122 of the three-tier levels of healthcare (Primary and Secondary healthcare facilities).  
123 The selected study sites included six primary healthcare facilities, three public  
124 secondary healthcare facilities, and three private secondary healthcare facilities in  
125 Ibadan Southwest LGA, Oyo State, Nigeria. Selected healthcare facilities offered a  
126 variation of in-patient and out-patient services.

### 127 Study Population

128 The population of this study comprised all adult patients who attended the selected  
129 study sites at the time of the study.

### 130 Inclusion and Exclusion Criteria

131 In this study, investigators included English-speaking outpatients as participants who  
132 were present at the selected study sites at the time of the visit.

133 Investigators excluded inpatients and non-English speaking outpatients present at the  
134 selected study sites from the study. In addition minors were excluded from the study.

### 135 Sampling and Sample Size Calculation

136 The researchers employed a multistage sampling technique to gather information from  
137 healthcare professionals in the study's selected locations. In the first stage,  
138 investigators purposely selected Ibadan South-west LGA because it had all three tiers

139 of healthcare facilities (primary, public secondary, and private secondary) necessary  
140 to carry out this study and an extensive population index (number of people per  
141 healthcare facility). Researchers divided healthcare facilities into three categories in  
142 the second stage: primary, public secondary, and private secondary. In the third phase,  
143 researchers randomly selected primary, private, and public healthcare facilities  
144 participating in the study using a balloting procedure.

145 Using Cochran's sample size formula ( $z^2pq / e^2$  where  $q = 1-p$ ), researchers selected  
146 385 patients from the population of 3,565,108 individuals in Ibadan to participate in  
147 the patient satisfaction survey. Investigators calculated the sample size with a  
148 confidence level of 95% with  $\alpha$  of 0.05 and a 5% Margin of Error.

#### 149 Data Collection and Instrument

150 Over the years, several patient satisfaction assessment tools have been designed to  
151 evaluate patient experience for healthcare service improvement.

152 In this study, Investigators obtained data from participants using the Short-form  
153 Patient Satisfaction Questionnaire (PSQ-18). The survey tool was condensed from the  
154 original PSQ questionnaire developed by Hays & Marshall to assess patient  
155 satisfaction concisely. A study conducted in India found the PSQ-18 valid and reliable,  
156 with internal consistency across subscales varying from 0.72 to 0.93.<sup>19</sup>

157 The PSQ-18 yields distinct scores for the following seven sub-scales: Financial  
158 Aspects, Time Spent with the doctor General Satisfaction, Technical  
159 Quality, Interpersonal Manner, Communication, Accessibility, and Convenience.

160 The researchers in this study obtained data from participants from 4<sup>th</sup> August 2022 to  
161 1<sup>st</sup> November 2022 from the selected study sites.

### 162 Statistical Analysis

163 Investigators utilized the Statistical Package for the Social Sciences (SPSS) software  
164 to determine whether the data had a normal distribution. They added the frequency  
165 proportions for strongly agree and agree (for positive statements) and strongly  
166 disagree and disagree (for negative statements) to calculate the Percentage of Positive  
167 Responses (PPR). Negative statements like “I have to pay more for medical care than  
168 I can afford” had a reversed response (5 = Strongly Disagree, 4 = Disagree, 3 =  
169 Neutral, 2 = Agree, and 1 = Strongly Agree). Positive statements like “My doctors  
170 treat me in a friendly and courteous manner” responded positively (5 = Strongly  
171 Agree, 4 = Agree, 3 = Neutral, 2 = Disagree, and 1 = Strongly disagree). Investigators  
172 calculated the PPR for each subscale of patient satisfaction by adding the frequency  
173 proportions for strongly agree and agree (positive statements) and strongly disagree  
174 and disagree (negative statements).

175 Additionally, researchers utilized a one-way analysis of variance (ANOVA) to  
176 compare the mean scores of the three institutions. All underlying assumptions of  
177 ANOVA were satisfied by this study.

### 178 Ethical Considerations

179 The Oyo State Research Ethics Review Committee, Ministry of Health Secretariat,  
180 Ibadan AD 13/479/4482 approved ethical considerations for this study. The



181 researchers requested permission from the selected healthcare facilities to carry out  
182 this study. This study posed no risk or harm to its participants. Participants gave their  
183 written and verbal agreement after being informed about the study's purpose and  
184 specifics. Participants were also assured that their answers would remain confidential  
185 and anonymous.

186 Investigators informed participants that participation was voluntary and that they  
187 could refuse to participate in the study. In addition, there were no repercussions for  
188 individuals who chose to end the study early or continue it at any point. Furthermore,  
189 investigators told participants that the study results would be disseminated in  
190 aggregate form to academic journals, policymakers, and healthcare managers without  
191 identifying their responses.

## 192 **Results**

193 Investigators distributed 400 copies of the short-form patient satisfaction  
194 questionnaire (PSQ-18) to patients across the selected healthcare facilities.  
195 Participants completed and returned 387 questionnaires with a 96.8% response rate.

### 196 **Perceptions of Patient Satisfaction among Patients Attending Hospitals in** 197 **Ibadan South-west Local Government**

198 Table 1. shows perceptions of patient satisfaction among patients attending hospitals  
199 in the Ibadan south local government area. Interpersonal manner (75.7%), and  
200 communication (84.5%) recorded the highest positive responses. Other subscales of  
201 patient satisfaction recorded a percentage of positive responses below 70%. The

202 financial aspect (54.9%) recorded the lowest percentage of positive responses.

203 **Table 1.** Frequency Distribution on Perceptions of Patient Satisfaction among

204 Patients Attending Hospitals in Ibadan South-west Local Government.

| Characteristics                                                     | Strongly<br>Disagree<br>n(%) | Disagree<br>(n(%)) | Undecided<br>n(%) | Agree<br>n(%) | Strongly<br>Agree<br>n(%) | % of positive<br>response<br>rate |
|---------------------------------------------------------------------|------------------------------|--------------------|-------------------|---------------|---------------------------|-----------------------------------|
| <b>General Satisfaction</b>                                         |                              |                    |                   |               |                           | <b>69.8</b>                       |
| The medical care I have been receiving is just about perfect        | 2(0.5)                       | 19(4.9)            | 60(15.5)          | 203(52.5)     | 103(26.6)                 | 79.1                              |
| I am dissatisfied with some things about the medical care I receive | 68(17.6)                     | 166(42.9)          | 49(12.7)          | 67(17.3)      | 37(9.6)                   | 60.5                              |
| <b>Technical Quality</b>                                            |                              |                    |                   |               |                           | <b>63.9</b>                       |
|                                                                     | 12(3.1)                      | 54(14.0)           | 76(19.6)          | 151(39.0)     | 94(24.3)                  | 63.3                              |

---

I think my doctor's office has  
everything needed to provide  
complete medical care

Sometimes doctors make me  
wonder if their diagnosis is  
correct

1

|         |           |           |           |           |      |
|---------|-----------|-----------|-----------|-----------|------|
| 15(3.9) | 104(26.9) | 102(26.4) | 120(31.0) | 46 (11.9) | 30.8 |
|---------|-----------|-----------|-----------|-----------|------|

When I go for medical care,  
they are careful to check  
everything when treating and  
examining me

|        |         |         |           |           |      |
|--------|---------|---------|-----------|-----------|------|
| 3(0.8) | 20(5.2) | 23(5.9) | 190(49.1) | 151(39.0) | 88.1 |
|--------|---------|---------|-----------|-----------|------|

I have some doubt about the  
ability of doctors who treat  
me

|          |           |          |         |         |      |
|----------|-----------|----------|---------|---------|------|
| 82(21.2) | 203(52.5) | 55(14.2) | 26(6.7) | 21(5.4) | 73.7 |
|----------|-----------|----------|---------|---------|------|

---

**Interpersonal Manner** **75.7**

---

|          |           |          |      |
|----------|-----------|----------|------|
| 59(15.2) | 192(49.6) | 45(11.6) | 64.8 |
|----------|-----------|----------|------|

---

---

Doctors act too businesslike 61(15.8) 30(7.8)  
and impersonal toward me

My doctors treat me in a very  
friendly and courteous 2(0.5) 22(5.7) 28(7.2) 191(49.4) 144(37.2) 86.6  
manner

---

**Communication 84.5**

---

Doctors are good about  
explaining the reason for 2(0.5) 11(2.8) 23(5.9) 183(47.3) 168(43.4) 90.7  
medical tests

Doctors sometimes ignore 81(20.9) 222(57.4) 31(8.0) 36(9.3) 17(4.4) 78.3  
what I tell them

---

**Financial Aspect 54.9**

---

---

I feel confident that I can get  
the medical care I need  
without being set back  
financially

|  |         |          |          |           |          |      |
|--|---------|----------|----------|-----------|----------|------|
|  | 23(5.9) | 64(16.5) | 43(11.1) | 175(45.2) | 82(21.2) | 66.4 |
|--|---------|----------|----------|-----------|----------|------|

I have to pay for more of my  
medical care than I can  
afford

|  |         |           |          |          |          |      |
|--|---------|-----------|----------|----------|----------|------|
|  | 32(8.3) | 136(35.1) | 75(19.4) | 99(25.6) | 45(11.6) | 43.4 |
|--|---------|-----------|----------|----------|----------|------|

---

**Time Spent with Doctors** **61.7**

---

Those who provide my  
medical care sometimes  
hurry too much when they  
treat me

|  |          |           |          |          |         |      |
|--|----------|-----------|----------|----------|---------|------|
|  | 47(12.1) | 206(53.2) | 43(11.1) | 65(16.8) | 26(6.7) | 65.3 |
|--|----------|-----------|----------|----------|---------|------|

|  |         |          |          |           |          |      |
|--|---------|----------|----------|-----------|----------|------|
|  | 17(4.4) | 79(20.4) | 66(17.1) | 165(42.6) | 60(15.5) | 58.1 |
|--|---------|----------|----------|-----------|----------|------|

Doctors usually spend plenty  
of time with me

---

---



---

**Accessibility and**

**65.3**

**Convenience**

---

Where I get medical care,

people have to wait too long 46(11.9) 158(40.8) 51(13.2) 69(17.8) 63(16.3) 52.7

for emergency treatment

---

I have easy access to the  
medical specialist I need

12(3.1) 49(12.7) 57(14.7) 181(46.8) 88(22.7) 69.5

I find it hard to get an

appointment for medical care 61(15.8) 160(41.3) 62(16.0) 65(16.8) 39(10.1) 57.1

right away

I am able to get medical

11(2.8) 35(9.0) 25(6.5) 193(49.9) 123(31.8) 81.7

whenever I need it

---

206

207 **Table 2.** Mean Differences in Patient Satisfaction in the Different Levels of  
208 Healthcare Facilities

209

| (I) Name of hospital        | (J) Name of hospital          | (Mean Difference (I-J)) | Std. Error | Sig. | F    | P-value |
|-----------------------------|-------------------------------|-------------------------|------------|------|------|---------|
| Primary Healthcare Facility | Public                        | -3.15                   | 1.94       | 0.11 | 1.43 | 0.24    |
|                             | Secondary Healthcare Facility |                         |            |      |      |         |
|                             | Private                       | -2.14                   | 2.28       | 0.35 |      |         |
|                             | Secondary Healthcare Facility |                         |            |      |      |         |

210

211 Table 2. The findings of this study also showed that there was no significant  
212 difference between the perception of patient satisfaction in the different levels of  
213 healthcare facilities in Ibadan South-west LGA.

214 **Discussion**

215 This study assessed patient satisfaction in Ibadan South-west LGA, Oyo State,  
216 Nigeria. The high response rate from this study corresponded with the response rate  
217 from another study conducted in Saudi Arabia.<sup>20</sup> Among the subscales of the PSQ-18,  
218 the financial aspect (54.9%) recorded the lowest Percentage of Positive Responses  
219 (PPR). This result was similar to a multicenter study conducted in India, where the  
220 financial aspect recorded the lowest satisfaction score.<sup>21</sup> Also in this study's subscale  
221 analysis, at least 22.4% of patients answered that they could not get healthcare  
222 services without being set back financially, and 37.2% paid more for medical care  
223 than they could afford. These findings correlated with studies that showed that the  
224 cost of medical care in Nigerian healthcare facilities is high.<sup>22,23</sup>

225 Among PSQ-18 subscales, communication (84.5%) recorded the highest PPR. About  
226 90.7% of participants responded that doctors were good about explaining reasons for  
227 medical tests, and 78.3% disagreed that doctors sometimes ignored their views. This  
228 result was similar to findings from another study conducted in the United States,  
229 where communication recorded a highly positive response. Effective communication  
230 extends beyond the exchange of medical information. It encompasses addressing the  
231 emotional needs of patients. In addition, healthcare professionals and patients must  
232 work together to make decisions that align with the patient's values, preferences, and  
233 goals. By involving patients in the decision-making process, healthcare providers can  
234 improve patient satisfaction and contribute to better treatment adherence and  
235 outcomes.

236 Other subscales such as general satisfaction, accessibility, convenience, time spent



237 with doctors, and technical quality, recorded positive responses below 70%,  
238 indicating a need for improvement. For instance, the results showed that 26.9% of  
239 participants were dissatisfied with some things about the medical care they received,  
240 23.6% responded that doctors acted too businesslike and impersonal towards them,  
241 and 34.1% of participants responded that where they received care, people had to wait  
242 too long for emergency treatment. These satisfaction levels are also seen in a study  
243 conducted in India, where the average level of satisfaction across all subscales was  
244 55.3%.<sup>24</sup>

245 Regarding the mean differences in patient satisfaction across the different levels of  
246 healthcare facilities, this study showed no significant difference in patient satisfaction  
247 levels across study sites. While the lack of statistical differences may point towards  
248 uniformity in patient satisfaction levels, it is equally essential to consider the  
249 possibility of common challenges that may be pervasive across all levels of healthcare  
250 facilities.

251 The study omits sociodemographic data collection to focus on patient satisfaction  
252 within a specific local government area, ensuring relevance and applicability to the  
253 targeted community. This simplified data collection processes and reduced participant  
254 burden, allowing for a more focused analysis of patient satisfaction metrics. However,  
255 this omission has limitations, such as compromised generalizability and potential bias  
256 in interpretation. This incomplete understanding of patient satisfaction dynamics may  
257 hinder efforts to address healthcare disparities and limit the scope of  
258 recommendations for service enhancement.

259

## 260 **Conclusion**

261 This study assessed patient satisfaction in Ibadan South-west LGA, Oyo State,  
262 Nigeria. The results of this study showed the need for improvement in patient  
263 satisfaction levels. To progress toward a more equitable and patient-centered  
264 approach, healthcare professionals should address the high cost of care and its impact  
265 on patients' financial aspects. This complex issue calls for cooperation, transparency,  
266 and systemic changes. Overall, healthcare managers, policymakers, and stakeholders  
267 should employ a proactive and holistic approach to increase patient satisfaction, lower  
268 financial barriers, and guarantee that healthcare remains a fundamental right rather  
269 than a financial burden.

270 To satisfy each patient's unique needs, preferences, and values, healthcare providers  
271 should consider customizing their treatments. Healthcare practitioners can foster a  
272 more compassionate and individualized experience that positively resonates with  
273 patients by including them in decision-making, respecting their autonomy, and  
274 considering their emotional well-being.

## 275 **Acknowledgment**

276 The authors would like to thank the management of the selected study sites and  
277 participants.

## 278 **Declaration of Conflicting Interests**

279 The author(s) declared no potential conflicts of interest concerning the research,  
280 authorship, and/or publication of this article.

### 281 **Ethical Approval**

282 The Oyo State Research Ethics Review Committee, Ministry of Health Secretariat,  
283 Ibadan AD 13/479/4482 granted this study ethical considerations.

### 284 **Funding**

285 The author(s) received no financial support for this article's research, authorship,  
286 and/or publication.

### 287 **ORCID iD**

288 Chukwuemeka Abel: <https://orcid.org/0000-0003-1461-5711>

289

### 290 **References**

- 1 Manzoor, F., Wei, L., Hussain, A., Asif, M., & Shah, S. Patient Satisfaction with Health Care Services; An Application of Physician's Behavior as a Moderator. International journal of environmental research and public health, 2019. <https://doi.org/10.3390/ijerph16183318>
- 2 Siegrist R. B., Jr. Patient satisfaction: history, myths, and misperceptions. The virtual mentor : VM. 2013. <https://doi.org/10.1001/virtualmentor.2013.15.11.mhst1-1311>
- 3 A. A'aqoulah, A.B. Kuyini, & S. Albalas, Exploring the Gap Between Patients' Expectations and Perceptions of Healthcare Service Quality, Patient Preference and Adherence, Volume 16, 2022, 1295-1305, doi:10.2147/PPA.S360852.

- 4 Clack, L., & Nagi, B. Examination of the Impact of Patient Engagement Tools on Patient Satisfaction. *International Journal of Patient-Centered Healthcare*, 2020, January, 10(1), 37–46. <https://doi.org/10.4018/ijpch.2020010103>
- 5 Davidson KW, Shaffer J, Ye S, Falzon L, Emeruwa IO, Sundquist K, Inneh IA, Mascitelli SL, Manzano WM, Vawdrey DK, Ting HH. Interventions to improve hospital patient satisfaction with healthcare providers and systems: a systematic review. *BMJ Qual Saf*. 2017 Jul;26(7):596-606. doi: 10.1136/bmjqs-2015-004758. Epub 2016 Aug 3. PMID: 27488124; PMCID: PMC5290224.
- 6 Jun J, Stern K, Djukic M. Integrative Review of the Interventions for Improving Patients' Experiences Revealed in Quality Improvement Projects. *Journal of Patient Experience*. 2020;7(6):882-892. doi:10.1177/2374373520925271
- 7 Ahmad, E., & Itrat, M. Patient Satisfaction With Medical Services Provided at Unani Medicine Hospital, Bengaluru: A Cross-Sectional Study. *Journal of patient experience*, 2020. <https://doi.org/10.1177/2374373520969001>
- 8 Cilović-Lagarija Š, Musa S, Stojisavljević S, Hasanica N, Kuduzović E, Palo M, Majdan M, Scherzer M, Habersaat KB, Smallwood C, Tahirukaj A, Nitzan D. Satisfaction with Health Care Services in the Adult Population of the Federation of Bosnia and Herzegovina during the COVID-19 Pandemic. *Medicina (Kaunas)*. 2022 Dec 31;59(1):97. doi: 10.3390/medicina59010097. PMID: 36676723; PMCID: PMC9867260.
- 9 Okafor CH, Ugwu AC, Okon IE. Effects of Patient Safety Culture on Patient Satisfaction With Radiological Services in Nigerian Radiodiagnostic Practice. *J Patient Exp*. 2018. doi: 10.1177/2374373518755500.
- 10 Okonta KE, Ogaji DS. Relationship Between Patient Satisfaction and Willingness to Comply With Physicians' Recommendation in Referral Surgical Outpatient Clinic in Nigeria. *J Patient Exp*. 2020. doi: 10.1177/2374373520942402.
- 11 Abdus-Salam RA, Adeniyi AA, Bello FA. Antenatal Clinic Waiting Time, Patient Satisfaction, and Preference for Staggered Appointment-A

---

Cross-Sectional Study. *J Patient Exp.* 2021. doi: 10.1177/23743735211060802.

- 12 Al-Harajin RS, Al-Subaie SA, Elzubair AG. The association between waiting time and patient satisfaction in outpatient clinics: Findings from a tertiary care hospital in Saudi Arabia. *J Family Community Med.* 2019. doi: 10.4103/jfcm.JFCM\_14\_18.
- 13 Michael A. Patient Satisfaction Is Not the Same as Patient Safety. *American Association for Clinical Chemistry.* 2018. <https://www.aacc.org/clin/articles/2018/janfeb/patient-satisfaction-is-not-the-same-as-patient-safety>. Accessed 2 Aug 2022
- 14 Santos-Jaén, J.M.; Valls Martínez, M.d.C.; Palacios-Manzano, M.; Grasso, M.S. Analysis of Patient Satisfaction through the Effect of Healthcare Spending on Waiting Times for Consultations and Operations. *Healthcare* 2022, 10, 1229. <https://doi.org/10.3390/healthcare10071229>
- 15 Balogun, J.A. (2021). A Qualitative Investigation of the Barriers to the Delivery of High-Quality Healthcare Services in Nigeria. In: *The Nigerian Healthcare System*. Springer, Cham. [https://doi.org/10.1007/978-3-030-88863-3\\_11](https://doi.org/10.1007/978-3-030-88863-3_11)
- 16 Soyemi TS, Aborode AT. Shortage of hospital bed capacity and overcrowding in emergency tertiary healthcare centers in Nigeria. *Ann Med Surg (Lond).* 2022 Sep 15;82:104675. doi: 10.1016/j.amsu.2022.104675. PMID: 36268429; PMCID: PMC9577657.
- 17 Oyo State Government, Local Government Areas and Local Council Development Areas, <https://upgrade.oyostate.gov.ng/lgas-lcdas-in-oyostate/> Accessed 2 Aug 2022.
- 18 Federal Ministry of Health, Nigeria. Facilities List. <https://hfr.health.gov.ng/facilities/hospitals-list>] Accessed 03 Aug 2022.
- 19 S. Goel, D. Sharma, & A. Singh, Development and Validation of a Patient Satisfaction Questionnaire for Outpatients Attending Health Centres in North

---

Indian Cities. *Journal of Health Services Research & Policy*, 19(2), 2014, 85–93.  
Available online: <http://www.jstor.org/stable/26751458>

- <sup>20</sup> A.A. Al Hayek, A.H. Al-Saeed, W.M. Alzahrani & M.A. Al Dawish, Assessment of Patient Satisfaction with On-Site Point-of-Care Hemoglobin A1c Testing: An Observational Study. *Diabetes Ther*, 12, 2021, 2531–2544, Available online: <https://doi.org/10.1007/s13300-021-01126-7>
- <sup>21</sup> Chander V, Bhardwaj AK, Raina SK, Bansal P, Agnihotri RK. Scoring the medical outcomes among HIV / AIDS patients attending antiretroviral therapy center at Zonal Hospital, Hamirpur, using Patient Satisfaction Questionnaire (PSQ-18). *Indian J Sex Transm Dis AIDS*. 2011 Jan;32(1):19-22. doi: 10.4103/0253-7184.81249. PMID: 21799571; PMCID: PMC3139283.
- <sup>22</sup> F.O. Bada, E. Okpokoro, N. Blok, E. Meribole, S. Dutt, P. Dakum, A. Abimiku, A. Zwerling & S.V. Kik, Cost of Three Models of Care for Drug-Resistant Tuberculosis Patients in Nigeria, *BMC Infectious Disease*, 10;19(1), 2019, 41. doi: 10.1186/s12879-018-3636-1. PMID: 30630429; PMCID: PMC6327521.
- <sup>23</sup> B.S. Aregbeshola & S.M. Khan, Determinants of Catastrophic Health Expenditure in Nigeria, *European Journal of Health Economy*, 19(4), 2018, 521-532. doi: 10.1007/s10198-017-0899-1, PMID: 28555372.
- <sup>24</sup> Holikatti PC, Kar N, Mishra A, Shukla R, Swain SP, Kar S. A study on patient satisfaction with psychiatric services. *Indian J Psychiatry*. 2012 Oct;54(4):327-32. doi: 10.4103/0019-5545.104817. PMID: 23372234; PMCID: PMC3554963.
